# Supplementary material for: Photoclick polysaccharide-based bioinks with an extended biofabrication window for 3D embedded bioprinting
Source: Royal Society of Chemistry journal article supplement (doi:10.1039/d2bm00632d), 2022-01-01
Supplement: d2bm00632d1.pdf [file d2bm00632d1.pdf]

## **Supporting Information**

### **Photoclick Polysaccharide-Based Bioink with Extended Biofabrication Window for 3D Embedded Bioprinting**

**Ke Zhou<sup>1</sup>, Miao Feng<sup>1</sup>, Hongli Mao<sup>1,2\*</sup>, Zhongwei Gu<sup>1,2\*</sup>**

<sup>1</sup> Research Institute for Biomaterials, Tech Institute for Advanced Materials, College of Materials Science and Engineering, Nanjing Tech University, Nanjing 211816, China

<sup>2</sup> NJTech-BARTY Joint Research Center for Innovative Medical Technology, Nanjing 210000, China

\*Corresponding author (E-mail: [h.mao@njtech.edu.cn](mailto:h.mao@njtech.edu.cn), [zwgu@scu.edu.cn](mailto:zwgu@scu.edu.cn))

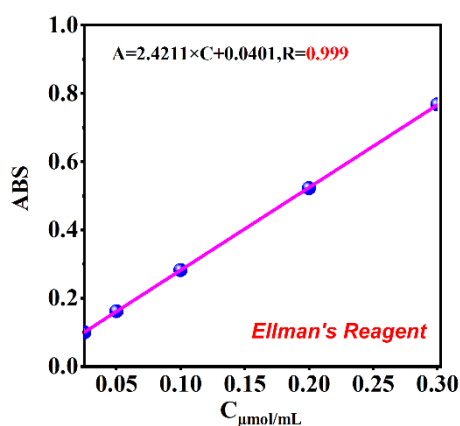

**Figure S1. The standard curve of a range of L-cysteine.** Ellman's reagent solution was prepared by dissolving 15 mg 5,5'-Dithiobis (2-nitrobenzoic acid) (DTNB) in 50 mL 0.5 M phosphate buffer at pH 8.0. The amounts of functional sulfhydryl group can be quantified by adding 500  $\mu\text{L}$  of standards or samples to 500  $\mu\text{L}$  Ellman's reagent solution, then incubated the solution at room temperature for 2 hours and analyzed using a UV-Vis spectrophotometer.

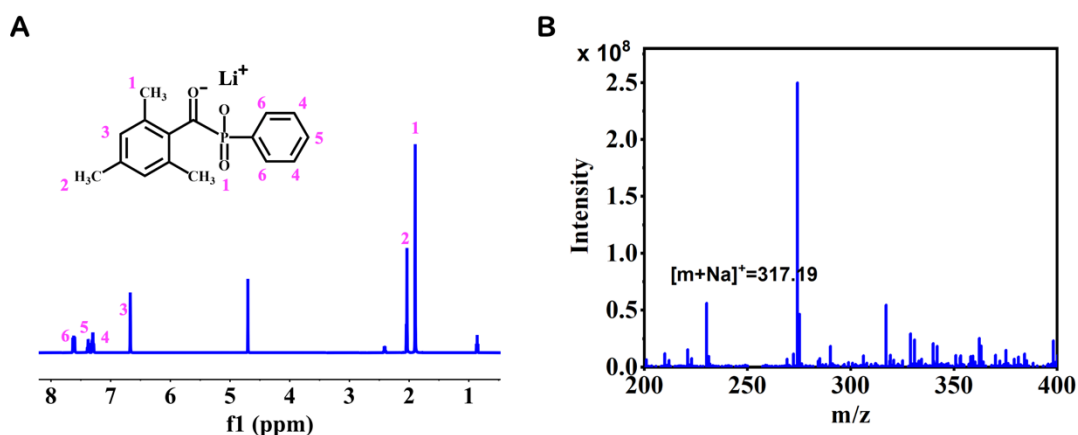

**Figure S2. The characterization of LAP.** (A)  $^1\text{H}$  NMR characterization of LAP in  $\text{D}_2\text{O}$ . (B) ESI-HRMS mass spectrum of LAP. The theoretical molecular weight is 294.21 and the observed m/z of 317.19 correspond to the  $[\text{M}+\text{Na}]^+$ .

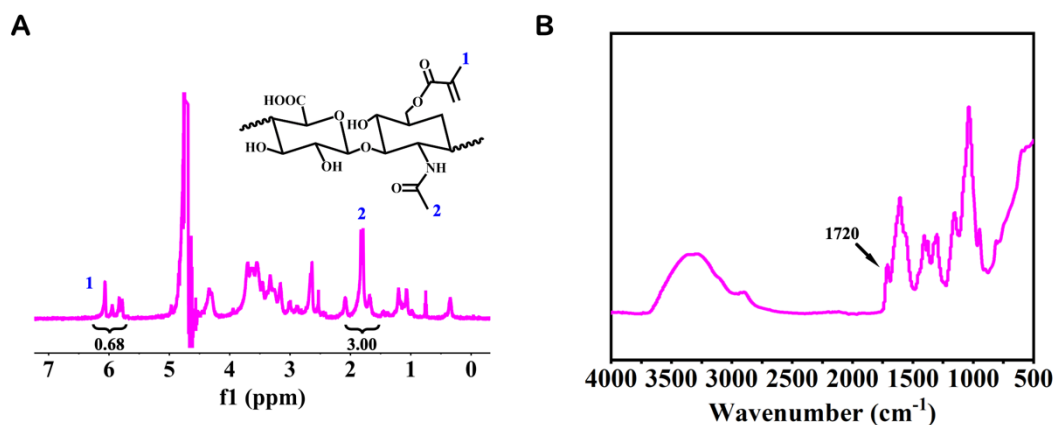

**Figure S3. The characterization of HAMA.** (A)  $^1\text{H}$  NMR characterization of HAMA in  $\text{D}_2\text{O}$ . Methacrylate modification was determined by integrating the a) vinyl protons of methacrylate (2H,  $\delta \sim 5.6\text{--}6.2$  ppm) relative to the b) methyl group of HA (3H,  $\delta \sim 1.8\text{--}2.0$  ppm) to obtain a relative norbornene modification of  $\sim 34\%$  of the disaccharide repeat units of HA. (B) FT-IR spectra of HAMA. The visible peaks at  $1720\text{ cm}^{-1}$  in FT-IR spectra belonged to HAMA.

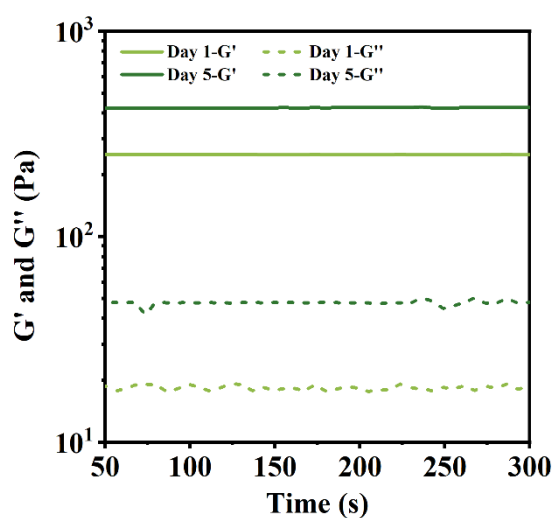

**Figure S4.** The rheological measurement of the liver models on Day 1 and 5 posting-bioprinting.
